# Supplementary material for: A novel fluorescent probe for efficient detection of fluoride ions in living animal and plant tissues
Source: Royal Society of Chemistry journal article supplement (doi:10.1039/d4ay01407c), 2024-01-01
Supplement: d4ay01407c1.pdf [file d4ay01407c1.pdf]

## *Supporting information*

### **A novel fluorescent probe: for efficient detection of fluoride ions in living animal and plant tissues**

Jun Chen<sup>1</sup>, Maoting Qu<sup>1</sup>, Jiahao Zhang<sup>1</sup>, Yongxue Yao<sup>1</sup>, Xinyu Pei<sup>1</sup>, Wen Wu<sup>2\*</sup> and Shuchen Pei<sup>1\*</sup>

<sup>1</sup>*College of Chemistry and Chemical Engineering, Chongqing University of Science and Technology, Chongqing 401331, PR China*

<sup>2</sup>*Chongqing Key Laboratory of High Active Traditional Chinese Drug Delivery System, Chongqing Engineering Research Center of Pharmaceutical Sciences, Chongqing Medical and Pharmaceutical College, Chongqing 404120, PR China*

\* Corresponding author E-mail: Wenwu: wuwen\_monica@outlook.com; Shuchen Pei: peishuchen928@163.com

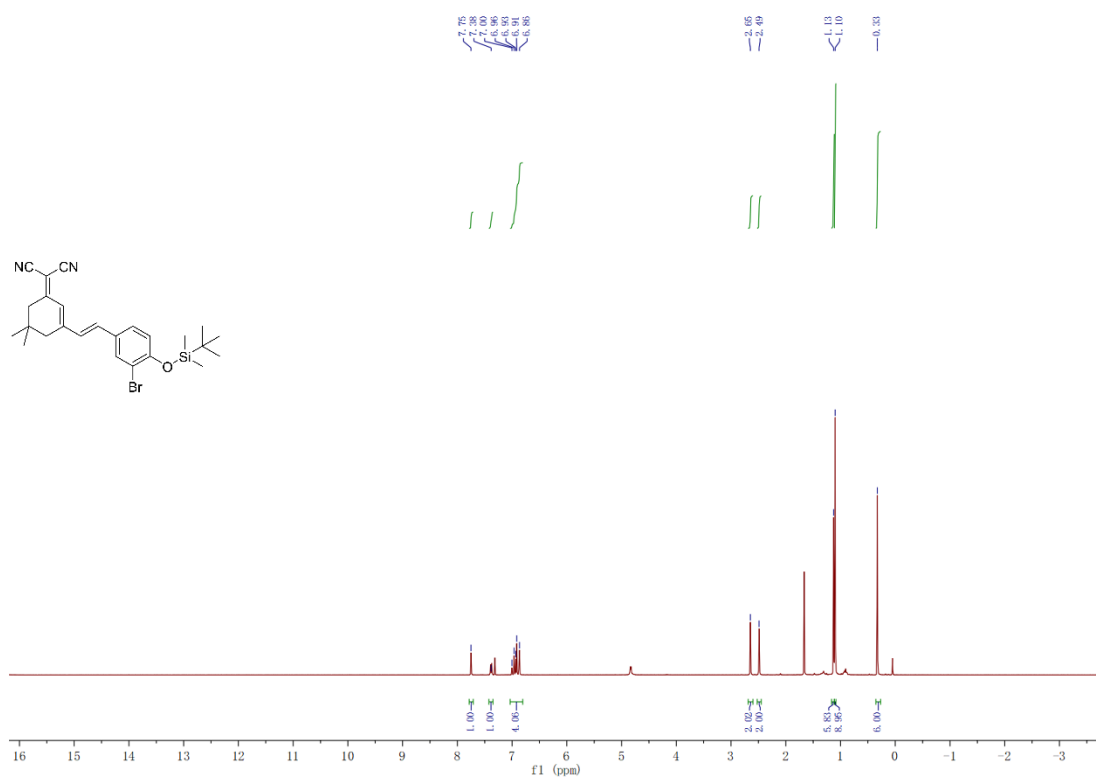

Fig. S1 <sup>1</sup>H NMR of IF-Br-F

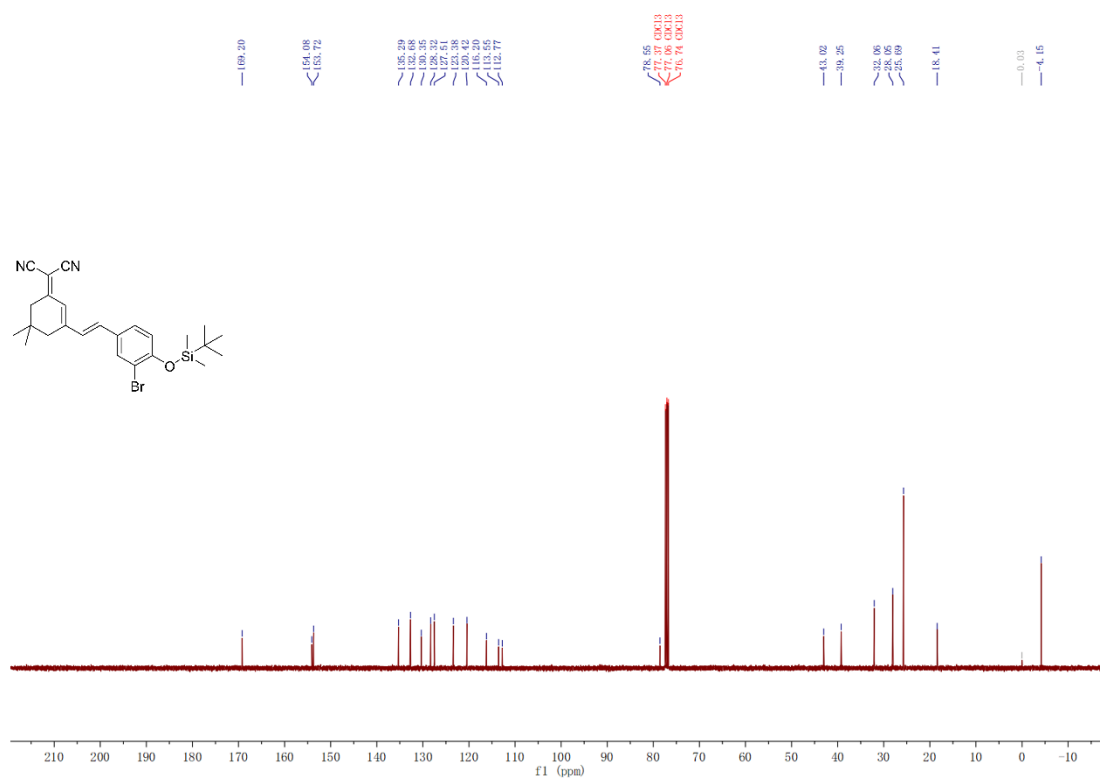

Fig. S2 <sup>13</sup>C NMR of IF-Br-F

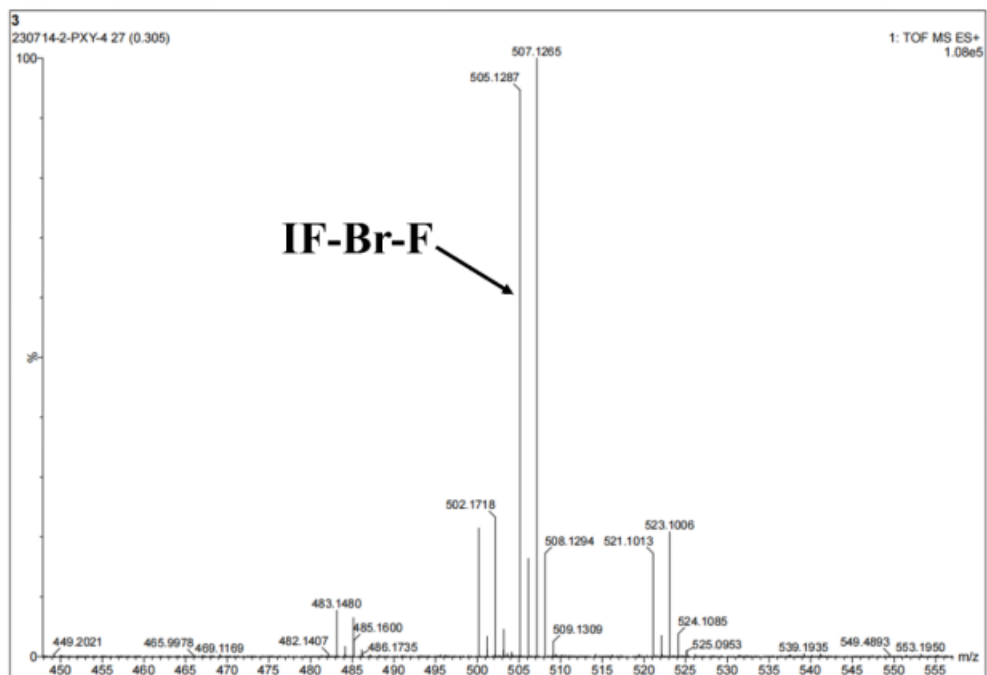

Fig. S3 HRMS of IF-Br-F

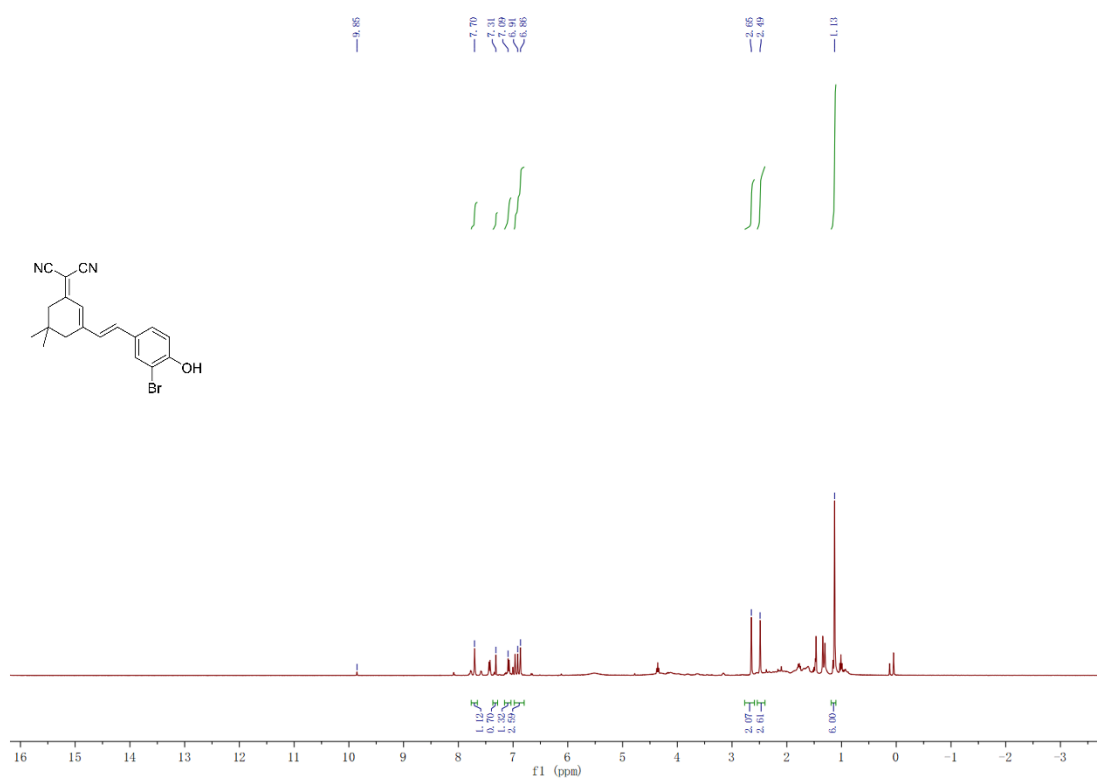

Fig. S4  $^1\text{H}$  NMR of IF-Br-OH



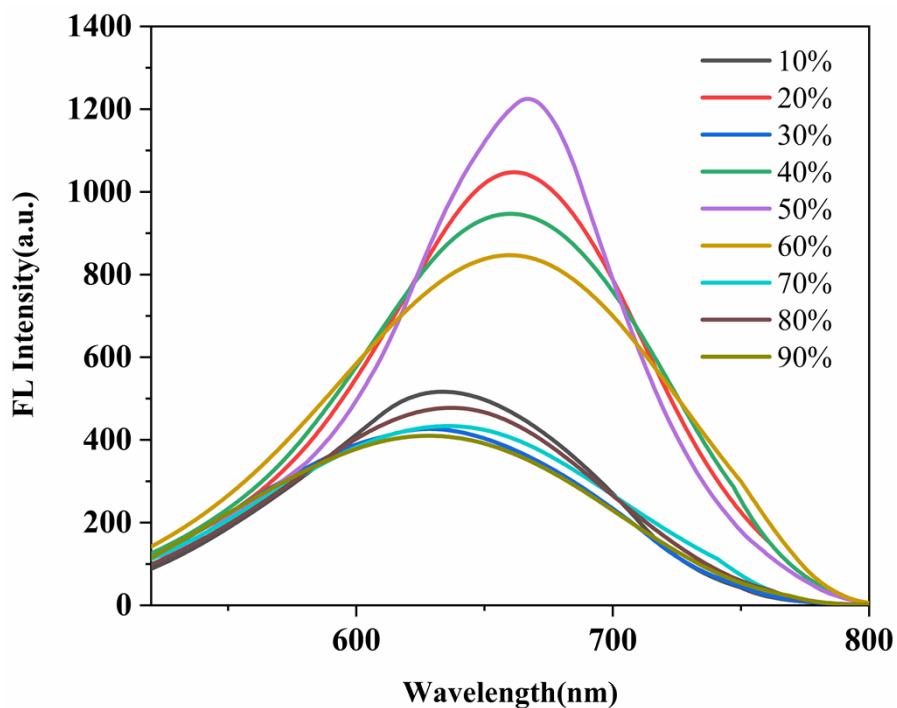

Fig. S7 fluorescence emission spectra of IF Br-F (10.0  $\mu\text{M}$ ) add fluoride ion (100.0  $\mu\text{M}$ ) fluorescence emission spectra in different ratios of DMSO and PBS buffer solutions.  $\lambda_{\text{ex}}=520$  nm.

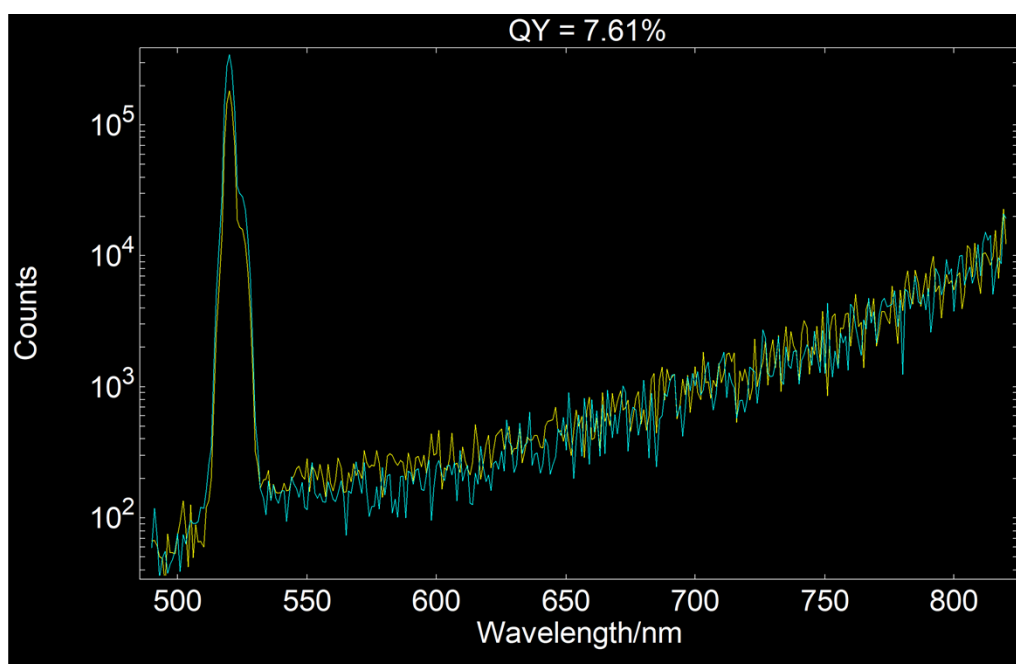

Fig. S8 IF-Br-F fluorescence quantum yield.  $\lambda_{\text{ex}}=520$  nm.
